# Supplementary material for: Anakinra reduces lung inflammation in experimental acute lung injury
Source: PubMed Central journal article supplement (PMC8767508; doi:10.1002/iid3.548), 2021-12-09

# Suppl. Figure 1

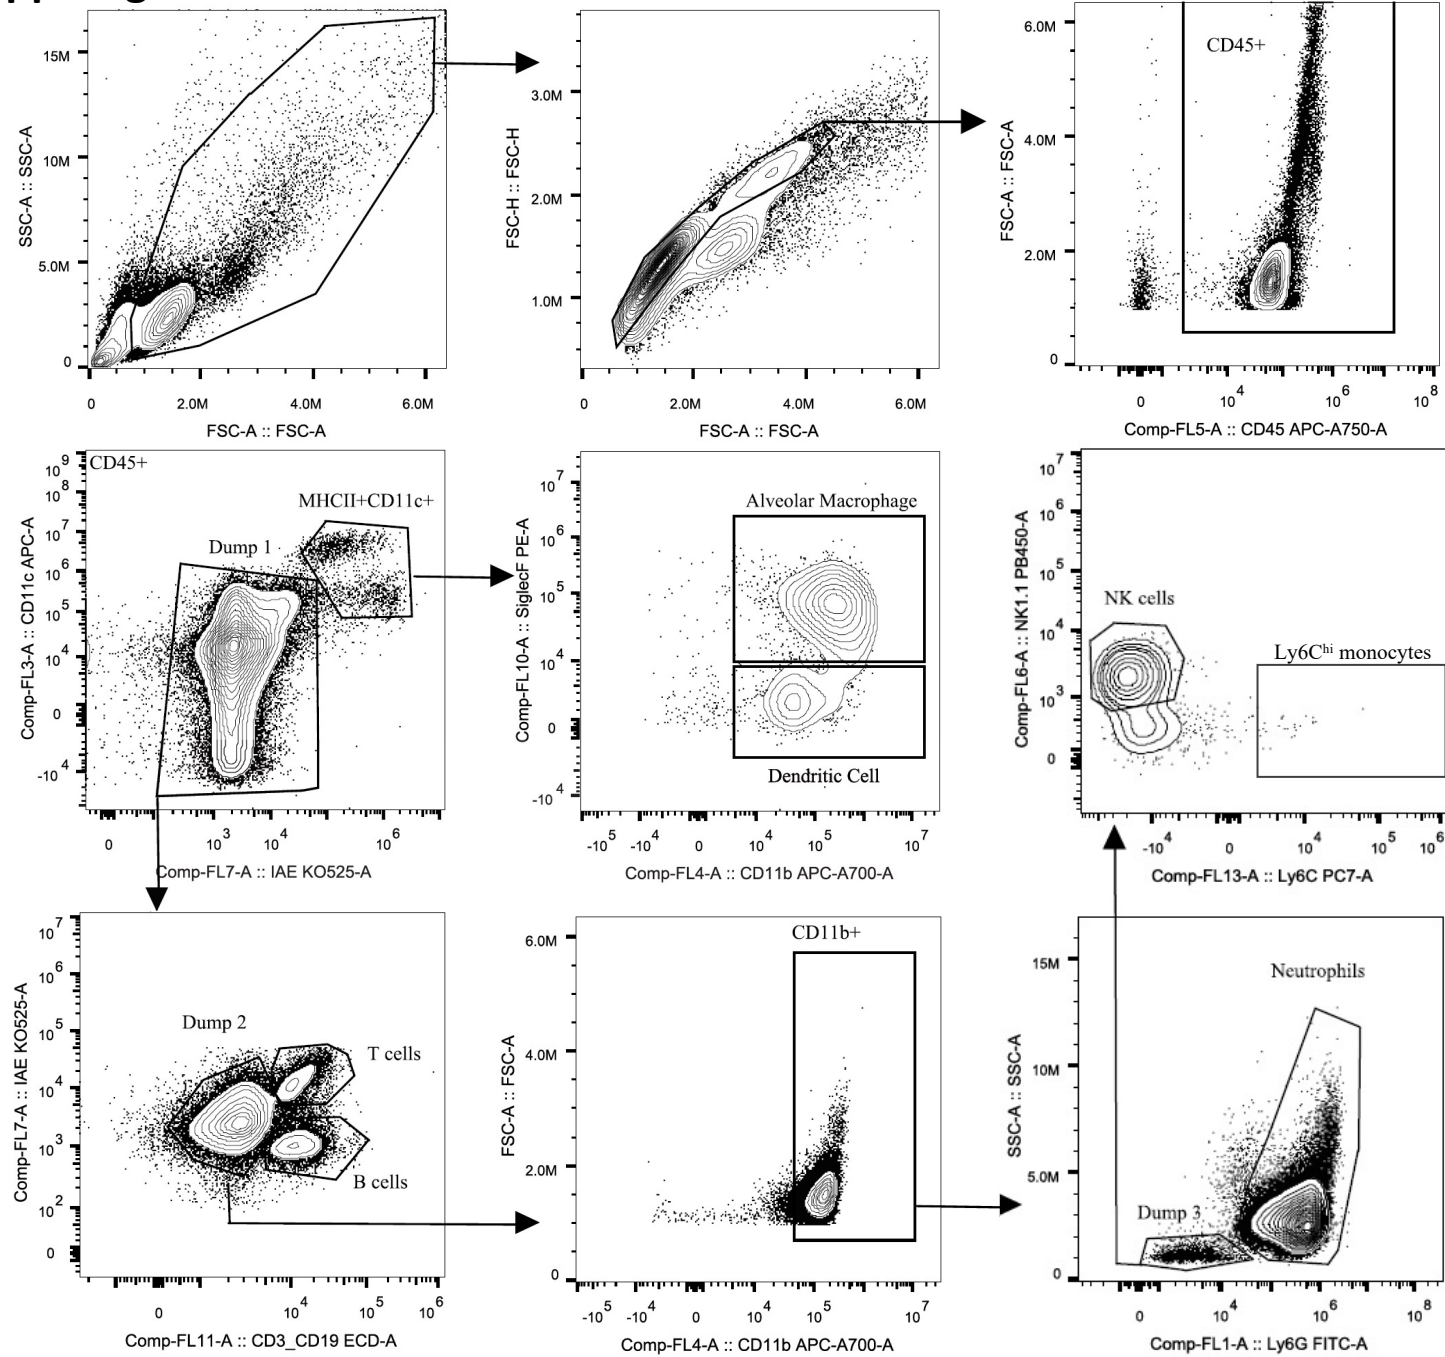

Supplement: IID3-10-123-s001.pdf [file IID3-10-123-s001.pdf]
